# Supplementary material for: Fast but not furious: a streamlined selection method for genome-edited cells
Source: PubMed Central journal article supplement (PMC8127327; doi:10.26508/lsa.202101051), 2021-04-26
Supplement: LSA-2021-01051_review_history.pdf [file LSA-2021-01051_review_history.pdf]

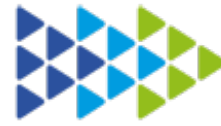

Life Science Alliance

# Fast but not furious: a streamlined selection method for genome edited cells

Haribaskar Ramachandran, Soraia Martins, Zacharias Kontarakis, Jean Krutmann, and Andrea Rossi

DOI: <https://doi.org/10.26508/lsa.202101051>

*Corresponding author(s): Andrea Rossi, Dr. Andrea Rossi*

---

## Review Timeline:

|                     |            |
|---------------------|------------|
| Submission Date:    | 2021-02-09 |
| Editorial Decision: | 2021-03-29 |
| Revision Received:  | 2021-04-01 |
| Accepted:           | 2021-04-13 |

---

*Scientific Editor: Shachi Bhatt*

## Transaction Report:

(Note: With the exception of the correction of typographical or spelling errors that could be a source of ambiguity, letters and reports are not edited. The original formatting of letters and referee reports may not be reflected in this compilation.)

March 29, 2021

RE: Life Science Alliance Manuscript #LSA-2021-01051-T

Andrea Rossi

IUF-Leibniz Research Institute for Environmental Medicine, Genome Engineering and Model Development lab (GEMD)

Dear Dr. Rossi,

Thank you for submitting your manuscript entitled "Fast but not furious: a streamlined selection method for genome edited cells". We apologize for this extended and unusual delay in getting back to you.

As you will note from the reviewers' comments, both reviewers are quite enthusiastic about the MAGECS method, and have requested for only minor text and data presentations edits. We would be happy to publish your paper in Life Science Alliance pending final revisions necessary to address the minor concerns raised by both the reviewers and meet our formatting guidelines.

Along with the points listed below, please also attend to the following:

- please add ORCID ID for the corresponding author-you should have received instructions on how to do so
- please add your main, supplementary figure, and table legends to the main manuscript text after the reference section
- please rename the "Disclosure declaration" section to "Conflict of interest"
- please add the contribution of all authors to our system
- please add a Category and a Summary Blurb/Alternate Abstract for your manuscript in our system
- please upload your main and supplementary figures as single files
- please upload your Table in editable .doc or excel format
- please add callouts for Figures S2A, B, and S3A, B to your main manuscript text
- please improve the visibility of the scale bars in Figures 1B and C
- the NGS and Sanger sequencing used to confirm the generation of indels in the various cells is included in the Methods section or Data availability section. It is our policy to include accession numbers for large datasets generated in our published manuscripts. Please elaborate if there is any confusion or concern about sharing these.

If you are planning a press release on your work, please inform us immediately to allow informing our production team and scheduling a release date.

To upload the final version of your manuscript, please log in to your account:

<https://lsa.msubmit.net/cgi-bin/main.plex>

You will be guided to complete the submission of your revised manuscript and to fill in all necessary information. Please get in touch in case you do not know or remember your login name.

To avoid unnecessary delays in the acceptance and publication of your paper, please read the following information carefully.

A. FINAL FILES:

These items are required for acceptance.

-- An editable version of the final text (.DOC or .DOCX) is needed for copyediting (no PDFs).

-- High-resolution figure, supplementary figure and video files uploaded as individual files: See our detailed guidelines for preparing your production-ready images, <https://www.life-science-alliance.org/authors>

-- Summary blurb (enter in submission system): A short text summarizing in a single sentence the study (max. 200 characters including spaces). This text is used in conjunction with the titles of papers, hence should be informative and complementary to the title. It should describe the context and significance of the findings for a general readership; it should be written in the present tense and refer to the work in the third person. Author names should not be mentioned.

## B. MANUSCRIPT ORGANIZATION AND FORMATTING:

Full guidelines are available on our Instructions for Authors page, <https://www.life-science-alliance.org/authors>

We encourage our authors to provide original source data, particularly uncropped/-processed electrophoretic blots and spreadsheets for the main figures of the manuscript. If you would like to add source data, we would welcome one PDF/Excel-file per figure for this information. These files will be linked online as supplementary "Source Data" files.

**\*\*Submission of a paper that does not conform to Life Science Alliance guidelines will delay the acceptance of your manuscript.\*\***

**\*\*It is Life Science Alliance policy that if requested, original data images must be made available to the editors. Failure to provide original images upon request will result in unavoidable delays in publication. Please ensure that you have access to all original data images prior to final submission.\*\***

**\*\*The license to publish form must be signed before your manuscript can be sent to production. A link to the electronic license to publish form will be sent to the corresponding author only. Please take a moment to check your funder requirements.\*\***

**\*\*Reviews, decision letters, and point-by-point responses associated with peer-review at Life Science Alliance will be published online, alongside the manuscript. If you do want to opt out of having the reviewer reports and your point-by-point responses displayed, please let us know immediately.\*\***

Thank you for your attention to these final processing requirements. Please revise and format the manuscript and upload materials within 2 days.

Thank you for this interesting contribution, we look forward to publishing your paper in Life Science Alliance.

Sincerely,

Shachi Bhatt, Ph.D.  
Executive Editor  
Life Science Alliance  
<https://www.lsjournal.org/>  
Tweet @SciBhatt @LSAJournal

-----  
Reviewer #1 (Comments to the Authors (Required)):

Haribaskar et al., described a new pipeline to sort genome edited cells that takes advantage of the ability to magnetically sort cells that express certain surface markers (eg CD19). In order to do so, the authors fused a tCD19 at the c-term of Cas9 (interspaced by a TA motif). At this point, they used magnetic sorting to sort genome edited cells from different cells types (including primary cells and iPSCs), highlighting the high efficiency and the easy to use of this method in sorting genome edited cells (SANGER and Deep Sequencing).

The manuscript is simple, well written and pretty straight forward in its intentions. I envision this method to be used in many labs, especially those with limited resources. I will also personally try this system out, considering how easier and straight forward it is compared to FACS sorting or antibiotics.

The figures seem a bit redundant, for instance Figure 2 could be used as a supplementary figure. Also, the manuscript mention the possibility to sort iPS cells deriving from human patients carrying certain diseases.

Did the author already try to perform such experiments? If so, the author should include these data in the manuscript.

Reviewer #2 (Comments to the Authors (Required)):

In this paper Ramachandran et al. established a selection method of genetically modified cells, called MAGECS, based on the ability to magnetically sort surface antigens in Cas9 positive cells. The protocol offers the advantage of being fast, cheap and easy to use and it can be applied to a variety of cells including primary cells and iPSCs. The experiments are clearly described and the manuscript is well written. I have only minor concerns:

- 1) The histogram in Supplementary Figure S2 should be included in Figure 1. It should be updated with statistical analysis and the statistics paragraph included in the Method section.
- 2) It is hard to assess that viability and morphologies of IPS are not affected by MAGECS by looking at Figure 4C. Please, substitute 4C image with two images (before and after MAGECS) at a higher magnification.
- 3) "MAGECS" should be included in the title.
- 4) Please revise all the manuscript for typos, in particular at the Method Section.

**Reviewer 1**

1. The figures seem a bit redundant, for instance Figure 2 could be used as a supplementary figure

**We have revised all figures as suggested by both reviewers and moved Figure 2 from the main text to the Supplementary figures.**

2. Also, the manuscript mentions the possibility to sort iPS cells deriving from human patients carrying certain diseases. Did the author already try to perform such experiments? If so, the author should include these data in the manuscript.

**A very good idea indeed. We did not have the chance to use MAGECS for the sorting of genome edited patient-derived iPSCs. However, we have been successfully enriching patient-derived iPSCs using magnetic sorting. Thus, we envision MAGECS to be successful in generating genome edited patient-derived iPSCs.**

**Reviewer 2**

1. The histogram in Supplementary Figure S2 should be included in Figure

1. It should be updated

with statistical analysis and the statistics paragraph included in the Method section.

**We thank the reviewer for pointing out this issue, statistical analysis has now been added to the main Figure 1. We have also updated the Methods section and Figure legend 1.**

2. It is hard to assess that viability and morphologies of IPS are not affected by MAGECS by looking at Figure 4C. Please, substitute 4C image with two images (before and after MAGECS) at a higher magnification.

**We agree with the reviewer's comment, however to avoid having redundant pictures (see reviewer 1) in the manuscript, we have revised the main text and highlighted that both karyotyping and pluripotency analysis were performed and indicated that MAGECS does not affect chromosome stability neither pluripotency.**

3. "MAGECS" should be included in the title.

**We thank the reviewer for the suggestion, however we like the short and direct title and would like to keep it as it is.**

4. Please revise all the manuscript for typos, in particular at the Method Section

**We thank the reviewer for the pointing out this issue, we have now revised the whole Methods section.**

Sincerely,

Andrea Rossi

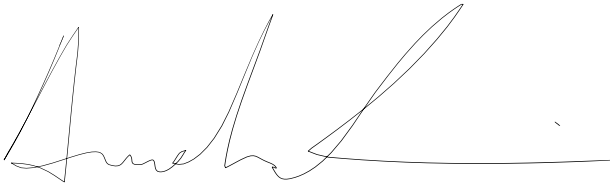A handwritten signature in black ink, appearing to read 'Andrea Rossi', with a long horizontal line extending to the right.

April 13, 2021

RE: Life Science Alliance Manuscript #LSA-2021-01051-TR

Dr. Andrea Rossi  
Dr. Andrea Rossi  
Genome Engineering and Model Development  
Auf'm Hennekamp 50  
Düsseldorf  
Düsseldorf, Nordrhein-Westfalen 40225

Dear Dr. Rossi,

Thank you for submitting your Research Article entitled "Fast but not furious: a streamlined selection method for genome edited cells". It is a pleasure to let you know that your manuscript is now accepted for publication in Life Science Alliance. Congratulations on this interesting work.

The final published version of your manuscript will be deposited by us to PubMed Central upon online publication.

Your manuscript will now progress through copyediting and proofing. It is journal policy that authors provide original data upon request.

Reviews, decision letters, and point-by-point responses associated with peer-review at Life Science Alliance will be published online, alongside the manuscript. If you do want to opt out of having the reviewer reports and your point-by-point responses displayed, please let us know immediately.

\*\*\*IMPORTANT: If you will be unreachable at any time, please provide us with the email address of an alternate author. Failure to respond to routine queries may lead to unavoidable delays in publication.\*\*\*

Scheduling details will be available from our production department. You will receive proofs shortly before the publication date. Only essential corrections can be made at the proof stage so if there are any minor final changes you wish to make to the manuscript, please let the journal office know now.

#### DISTRIBUTION OF MATERIALS:

Authors are required to distribute freely any materials used in experiments published in Life Science Alliance. Authors are encouraged to deposit materials used in their studies to the appropriate repositories for distribution to researchers.

You can contact the journal office with any questions, contact [contact@life-science-alliance.org](mailto:contact@life-science-alliance.org)

Again, congratulations on a very nice paper. I hope you found the review process to be constructive and are pleased with how the manuscript was handled editorially. We look forward to future exciting submissions from your lab.

Sincerely,

Shachi Bhatt, Ph.D.

Executive Editor

Life Science Alliance

<http://www.lsjournal.org>

Tweet @SciBhatt @LSAJournal
